# Supplementary material
Source: PubMed Central journal article supplement (PMC2242679)
Supplement: pnas_0710189104_1.pdf [file pnas_0710189104_1.pdf]

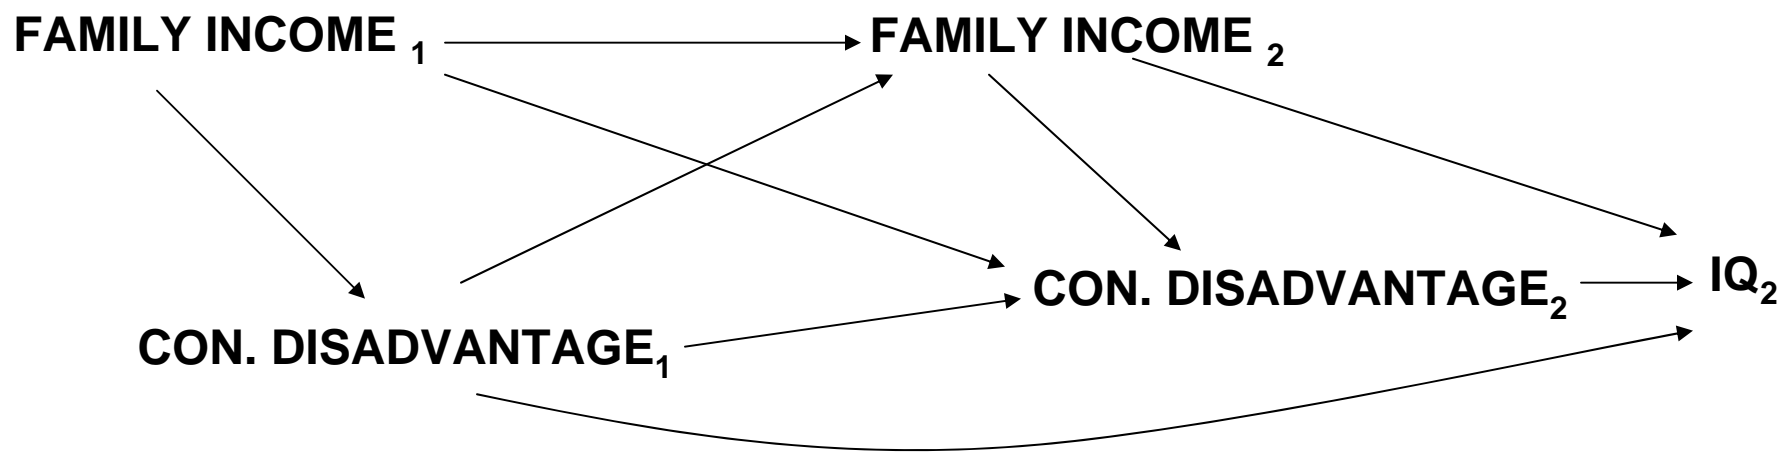

•Not including Family Income<sub>2</sub> and Concentrated Disadvantage<sub>1</sub> will cause bias because both are confounded with Concentrated Disadvantage<sub>2</sub> and IQ at Time<sub>2</sub>.

•But including Family Income<sub>2</sub> and Concentrated Disadvantage<sub>1</sub> will also cause bias because Family Income<sub>2</sub> can be affected by Concentrated Disadvantage<sub>1</sub>.
