# Supplementary material
Source: PubMed Central journal article supplement (PMC2242679)
Supplement: pnas_0710189104_2.pdf [file pnas_0710189104_2.pdf]

**Table 6. Descriptive statistics for baseline (wave 0) and wave 1 predictors (columns 1 and 2), and logit models for selection into concentrated disadvantage at wave 1 and wave 2 (columns 3 through 6): PHDCN cohorts 6-12, African-American children**

|                                                                        | Descriptives |           | Model results                      |           |                  |          |
|------------------------------------------------------------------------|--------------|-----------|------------------------------------|-----------|------------------|----------|
|                                                                        | Mean         | s.d.      | Outcome: Concentrated Disadvantage |           |                  |          |
|                                                                        |              |           | Wave 1 treatment                   |           | Wave 2 treatment |          |
|                                                                        |              | Bivariate | Multivariate                       | Bivariate | Multivariate     |          |
| <b>Time-invariant and time-varying covariates measured at baseline</b> |              |           |                                    |           |                  |          |
| Concentrated disadvantage                                              | 29%          | 0.45      | 52.24 **                           | 69.48 **  | 12.18 **         | 2.28 *   |
| Verbal ability                                                         | 0.92         | 14.74     | 0.98 **                            | 0.99      | 0.98 **          | 0.99     |
| Length of residence                                                    | 6.53         | 7.91      | 0.99                               | 0.97 *    | 1.01             | 1.01     |
| Homeowner                                                              | 25%          | 0.43      | 0.53 **                            | 0.98      | 0.63 *           | 0.79     |
| Caregiver age                                                          | 36.52        | 9.25      | 1.00                               | 1.02      | 1.02             | 1.03     |
| Subject age                                                            | 9.06         | 2.51      | 1.01                               | 1.05      | 1.03             | 1.02     |
| Caregiver is male                                                      | 8%           | 0.27      | 0.42 *                             | 0.92      | 0.64             | 1.39     |
| Subject is male                                                        | 49%          | 0.50      | 1.35                               | 1.14      | 1.50 *           | 1.00     |
| Receives welfare                                                       | 49%          | 0.50      | 2.27 **                            | 1.57      | 1.78 **          | 1.07     |
| Caregiver works                                                        | 51%          | 0.50      | 0.57 **                            | 1.24      | 0.62 **          | 0.91     |
| Caregiver's partner works                                              | 33%          | 0.47      | 0.67 *                             | 0.90      | 0.72             | 0.37 *   |
| Occupational status                                                    | 42.65        | 16.39     | 0.98 **                            | 1.01      | 0.99 *           | 1.03 *   |
| Household size                                                         | 5.33         | 2.27      | 1.10 **                            | 1.04      | 1.07 *           | 0.99     |
| Family criminality                                                     | 0.67         | 1.08      | 0.99                               | 0.77 *    | 0.96             | 0.97     |
| Domestic violence                                                      | 2.40         | 2.86      | 1.02                               | 0.97      | 0.99             | 0.99     |
| Caregiver social support                                               | 2.62         | 0.29      | 0.40 **                            | 0.33 *    | 0.62             | 1.19     |
| Caregiver depression                                                   | 21%          | 0.41      | 1.21                               | 1.29      | 1.63             | 0.96     |
| US citizen                                                             | 98%          | 0.15      | 7.63 *                             | 1.90      | 6.77             | 1.17     |
| Marital status (single is reference)                                   |              |           |                                    |           |                  |          |
| Caregiver married                                                      | 33%          | 0.47      | 0.63 **                            | 1.46      | 0.77             | 2.56 *   |
| Caregiver cohabits                                                     | 13%          | 0.34      | 1.43                               | 1.43      | 1.59 *           | 2.10     |
| Education (high school diploma is reference)                           |              |           |                                    |           |                  |          |
| < high school ed.                                                      | 30%          | 0.46      | 1.89 **                            | 1.25      | 1.60 **          | 1.10     |
| some college                                                           | 51%          | 0.50      | 0.85                               | 1.13      | 0.87             | 1.16     |
| college degree                                                         | 8%           | 0.27      | 0.26                               | 0.56      | 0.33 **          | 0.33     |
| Income (30-40k is reference)                                           |              |           |                                    |           |                  |          |
| less than 10k                                                          | 33%          | 0.47      | 1.67 **                            | 1.51      | 1.29             | 0.60     |
| 10-20k                                                                 | 18%          | 0.38      | 1.35                               | 1.77      | 1.28             | 0.63     |
| 20-30k                                                                 | 15%          | 0.36      | 1.00                               | 0.82      | 1.16             | 0.80     |
| 40-50k                                                                 | 8%           | 0.27      | 0.68                               | 0.66      | 0.66             | 0.50     |
| over 50k                                                               | 12%          | 0.33      | 0.31 **                            | 1.17      | 0.28 **          | 0.45     |
| <b>Time-varying covariates, measured at time 1</b>                     |              |           |                                    |           |                  |          |
| Concentrated disadvantage                                              | 30%          | 0.46      |                                    |           | 28.45 **         | 19.19 ** |
| Verbal ability                                                         | -1.48        | 14.61     |                                    |           | 0.98 **          | 0.99     |
| Homeowner                                                              | 26%          | 0.44      |                                    |           | 0.47 **          | 0.82     |
| Receives welfare                                                       | 40%          | 0.49      |                                    |           | 1.77 **          | 1.16     |
| Caregiver works                                                        | 62%          | 0.49      |                                    |           | 0.48 **          | 1.52     |
| Caregiver's partner/spouse works                                       | 35%          | 0.48      |                                    |           | 0.84             | 3.43 *   |
| Occupational status                                                    | 42.62        | 16.70     |                                    |           | 0.98 **          | 0.99     |
| Household size                                                         | 5.37         | 2.28      |                                    |           | 1.09 *           | 1.01     |
| Marital status (single is reference)                                   |              |           |                                    |           |                  |          |
| Caregiver married                                                      | 32%          | 0.47      |                                    |           | 0.58 **          | 0.34     |
| Caregiver cohabits                                                     | 12%          | 0.32      |                                    |           | 1.71 *           | 0.39     |
| Income (30-40k is reference)                                           |              |           |                                    |           |                  |          |
| less than 10k                                                          | 29%          | 0.45      |                                    |           | 1.94 **          | 1.61     |
| 10-20k                                                                 | 19%          | 0.39      |                                    |           | 1.18             | 1.02     |
| 20-30k                                                                 | 15%          | 0.36      |                                    |           | 0.87             | 0.95     |
| 40-50k                                                                 | 9%           | 0.28      |                                    |           | 1.11             | 1.40     |
| over 50k                                                               | 18%          | 0.38      |                                    |           | 0.33 **          | 0.79     |
|                                                                        |              |           | chi squared p-value:               | 0.00      |                  | 0.00     |
|                                                                        |              |           | pseudo r-squared:                  | 0.49      |                  | 0.41     |

Notes: \* = significant at p<.05; \*\* = significant at p<.01.
